# Supplementary material for: Narcissus Going Public: Pathological Narcissism and Reactions to Public vs. Private Exposure in Ego-relevant Events
Source: Springer Nature journal article supplement (doi:10.1007/s10862-022-09998-0), 2022-11-02
Supplement: MOESM1 [file 23665662]

**APPENDIX A – SUPPLEMENTARY MATERIALS**

*Scenarios for ego-threatening and ego-fostering events occurring in private or public settings*

| **Private Setting** | **Public Setting** |
| --- | --- |
| ***Ego-Threatening Event***  The professor you chose as a mentor assigned the class an essay on a topic you are interested in. You worked on the assignment for weeks, doing a lot of literature research. You gave your best and finally today you will know your grade. You sit in the classroom with all the other students when the professor comes in with all the graded essays. After reading the grades of the first students in the list he calls your name and stares at you.  He takes you aside, so that no one else can hear, and he says:  “Your work is really trivial. Among all these essays, yours is by far the worst. It seems you didn’t understand anything about this topic. You showed a severely insufficient knowledge. In my opinion, if one student shows this kind of skills, he or she is not likely to get a degree. You should start considering an alternative career”. | ***Ego-Threatening Event***  The professor you chose as a mentor assigned the class an essay on a topic you are interested in. You worked on the assignment for weeks, doing a lot of literature research. You gave your best and finally today you will know your grade. You sit in the classroom with all the other students when the professor comes in with all the graded essays. After reading the grades of the first students in the list he calls your name and stares at you.  He asks you to stand up and, in front of the entire classroom, says:  “Your work is really trivial. Among all these essays, yours is by far the worst. It seems you didn’t understand anything about this topic. You showed a severely insufficient knowledge. In my opinion, if one student shows this kind of skills, he or she is not likely to get a degree. You should start considering an alternative career”. |
| ***Ego-Fostering Event***  The professor you chose as a mentor assigned the class an essay on a topic you are interested in. You worked on the assignment for weeks, doing a lot of literature research. You gave your best and finally today you will know your grade. You sit in the classroom with all the other students when the professor comes in with all the graded essays. After reading the grades of the first students in the list he calls your name and stares at you.  He takes you aside, so that no one else can hear, and he says:  “Your work is really brilliant. Among all these essays, yours is by far the best. It seems you got every detail of this topic. You showed an excellent knowledge. In my opinion, if one student shows this kind of skills, he or she is likely to get a degree with the highest grades and honors. I am sure you will give a great contribution to our field”. | ***Ego-Fostering Event***  The professor you chose as a mentor assigned the class an essay on a topic you are interested in. You worked on the assignment for weeks, doing a lot of literature research. You gave your best and finally today you will know your grade. You sit in the classroom with all the other students when the professor comes in with all the graded essays. After reading the grades of the first students in the list he calls your name and stares at you.  He asks you to stand up and, in front of the entire classroom, says:  “Your work is really brilliant. Among all these essays, yours is by far the best. It seems you got every detail of this topic. You showed an excellent knowledge. In my opinion, if one student shows this kind of skills, he or she is likely to get a degree with the highest grades and honors. I am sure you will give a great contribution to our field”. |

**APPENDIX B – SUPPLEMENTARY MATERIALS**

|  | Ego-threatening event | | | | Ego-fostering event | | | | Event | Setting | Event  X Setting |
| --- | --- | --- | --- | --- | --- | --- | --- | --- | --- | --- | --- |
|  | Private | | Public | | Private | | Public | |
|  | *M* | *SD* | *M* | *SD* | *M* | *SD* | *M* | *SD* |
| GN | 109.52 | 24.95 | 104.83 | 23.15 | 107.32 | 22.42 | 105.91 | 23.04 | *F*1, 352 *=* .06 *η2p =* .00  *p* =.81 | *F*1, 352 *=* 1.73 *η2p =* .00  *p =* .19 | *F*1, 352 *= .50 η2p =* .00  *p* = .48 |
| VN | 52.05 | 9.66 | 51.03 | 9.53 | 52.36 | 10.12 | 51.27 | 9.20 | *F*1, 352 *=* .08 *η2p =* .00  *p* =.77 | *F*1, 352 *=* 1.22 *η2p =* .00  *p =* .27 | *F*1, 352 *=* .00 *η2p =* .00  *p* = .97 |
| Agency | 4.67 | 1.23 | 4.74 | 1.19 | 4.54 | 1.20 | 4.58 | 1.10 | *F*1, 352 *=* 1.53 *η2p =* .00  *p* =.22 | *F*1, 352 *=* .22 *η2p =* .00  *p =* .64 | *F*1, 352 *= .02 η2p =* .00  *p* = .88 |
| Communion | 5.13 | 1.17 | 5.04 | 1.25 | 5.14 | 1.13 | 4.92 | 1.04 | *F*1, 352 *=* .22 *η2p =* .00  *p = .64* | *F*1, 352 *=* 1.94 *η2p =* .00  *p = .17* | *F*1, 352 *=* .30 *η2p =* .00  *p =*.58 |
| Fear | 2.52 | .94 | 2.38 | .86 | 2.44 | .93 | 2.39 | .89 | *F*1, 352 *=* .13 *η2p =* .00  *p = .72* | *F*1, 352 *=* 1.12 *η2p =* .00  *p = .29* | *F*1, 352 *=* .25 *η2p =* .00  *p =*.62 |

**Table B1** *Effects of Event, Setting and their interaction term on narcissism, state self-esteem and affective states before the experimental manipulation.*

*Note. N =* 406*; GN =* Grandiose Narcissism*; VN =* Vulnerable Narcissism*.*

**Table B1** *(continued)*

|  | Ego-threatening event | | | | Ego-fostering event | | | | Event | Setting | Event  X  Setting |
| --- | --- | --- | --- | --- | --- | --- | --- | --- | --- | --- | --- |
|  | Private | | Public | | Private | | Public | |
|  | *M* | *SD* | *M* | *SD* | *M* | *SD* | *M* | *SD* |
| Hostility | 1.99 | .70 | 1.97 | .76 | 1.92 | .68 | 2.02 | .69 | *F*1, 352 *=* 1.03  *η2p =* .00  *p =*.99 | *F*1, 352 *= .33*  *η2p =* .00  *p =.57* | *F*1, 352 *=* .71  *η2p =* .00  *p =*.40 |
| Joy | 2.68 | .90 | 2.50 | .76 | 2.61 | .81 | 2.73 | .71 | *F*1, 352 *=* 1.06  *η2p =* .00  *p =*.30 | *F*1, 352 *=* .17  *η2p =* .00  *p =.68* | *F*1, 352 *=* 3.77  *η2p =* .01  *p =*.05 |
| Sadness | 2.40 | .91 | 2.34 | .90 | 2.40 | .91 | 2.42 | .87 | *F*1, 352 *=* .24  *η2p =* .00  *p = .62* | *F*1, 352 *=* .04  *η2p =* .00  *p = .84* | *F*1, 352 *=* .16  *η2p =* .00  *p =.69* |
| Self-Assurance | 2.73 | .77 | 2.59 | .69 | 2.71 | .72 | 2.75 | .65 | *F*1, 352 *=* .96  *η2p =* .00  *p = .33* | *F*1, 352 *=* .64  *η2p =* .00  *p = .42* | *F*1, 352 *=* 1.69  *η2p =* .00  *p = .20* |

*Note. N =* 406*; GN =* Grandiose Narcissism*; VN =* Vulnerable Narcissism*.*
